# Supplementary material for: In-flow single particle detection of sub-100 micron microplastics
Source: Royal Society of Chemistry journal article supplement (doi:10.1039/d5ra04700e), 2025-01-01
Supplement: d5ra04700e2.pdf [file d5ra04700e2.pdf]

**Video analysis of PS particle via TrackMate plugin on Fiji**

Raw video

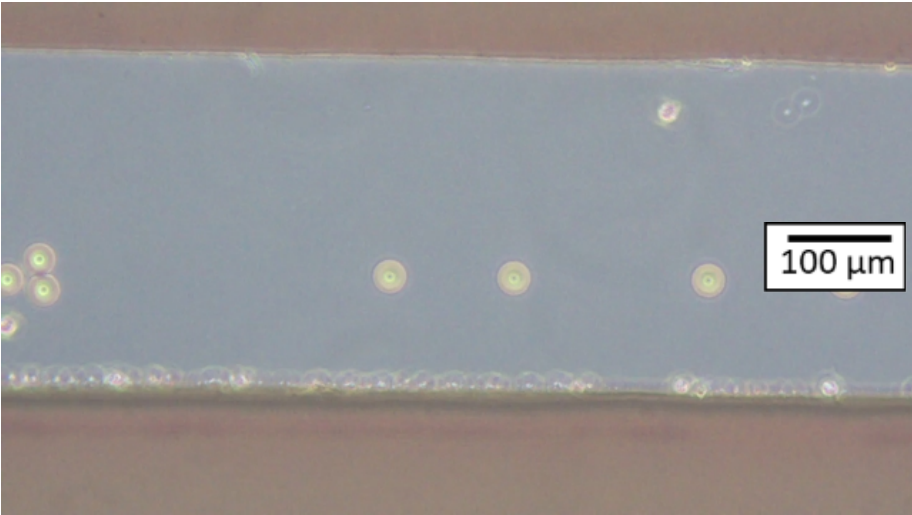

Treated video

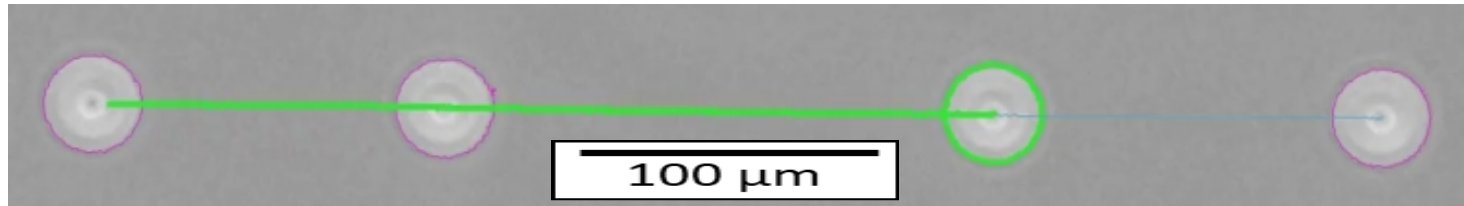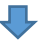

Generated data

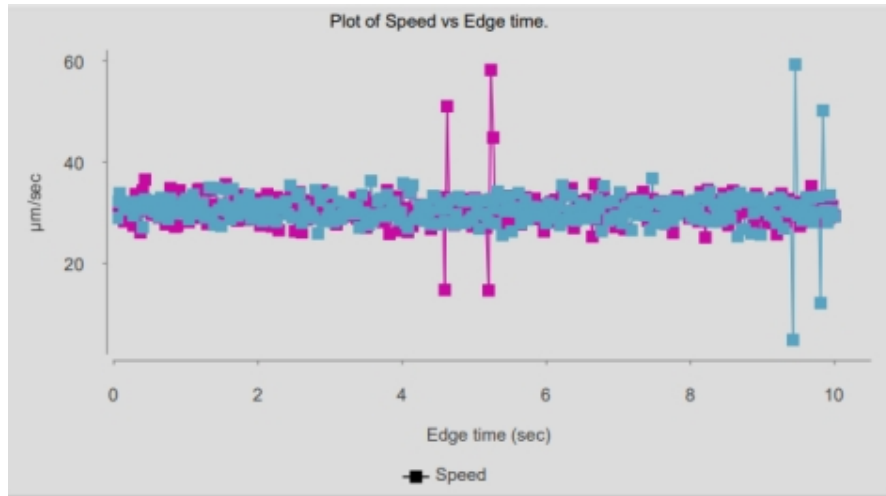

+ Mean speed, etc.

## Video analysis of PE particle via TrackMate plugin on Fiji

Raw video

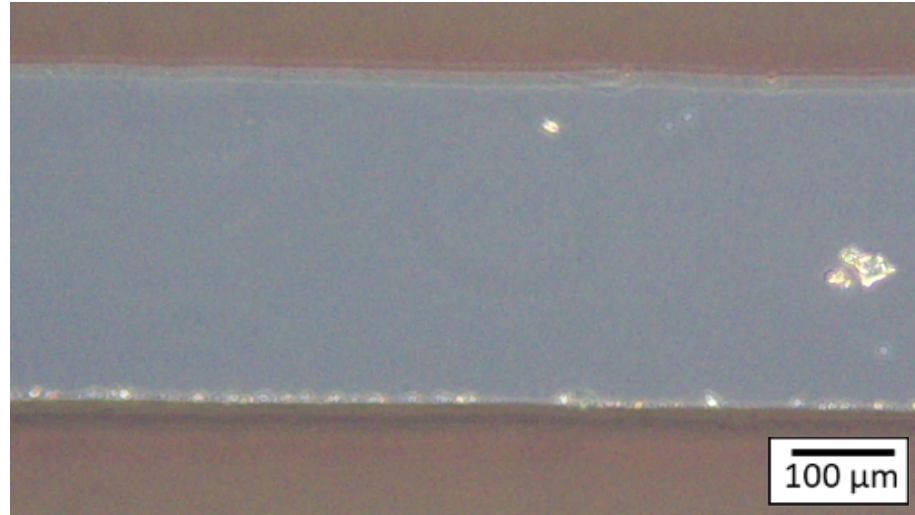

Treated video

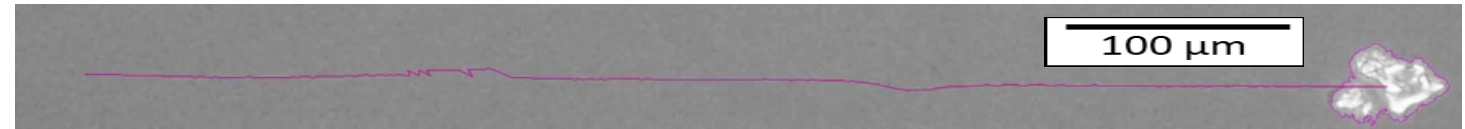

Generated data

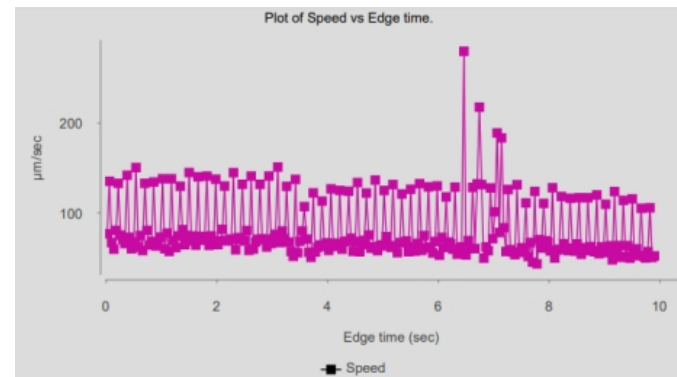

+ Mean speed, etc.

# Video analysis of PP particle via TrackMate plugin on Fiji

Raw video

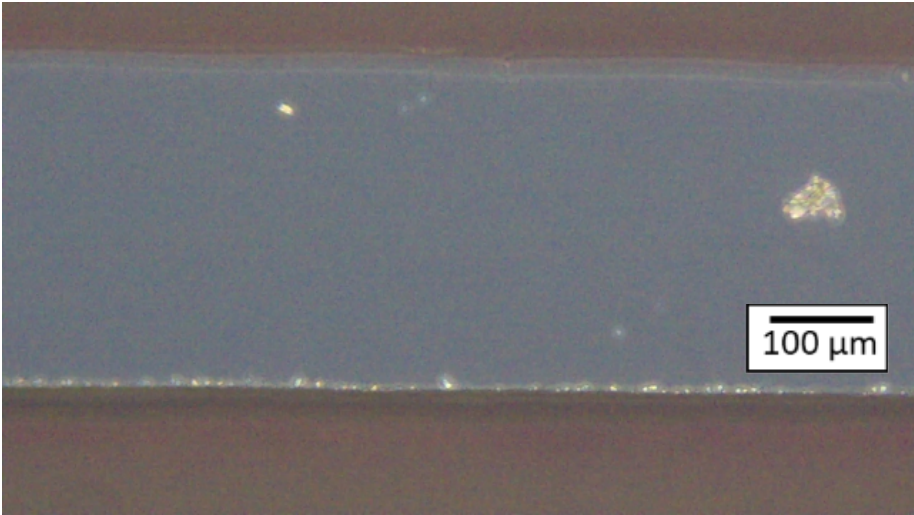

Treated video

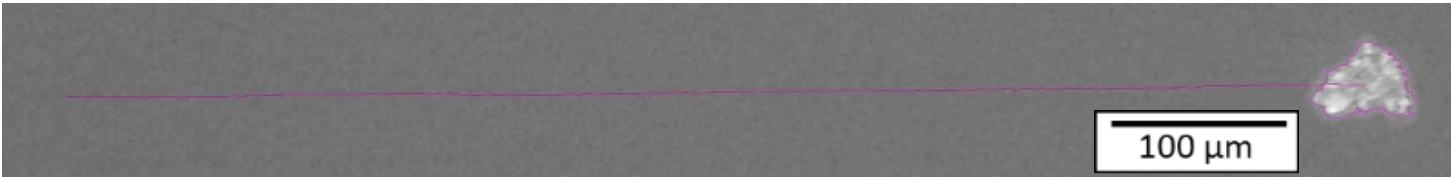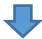

Generated data

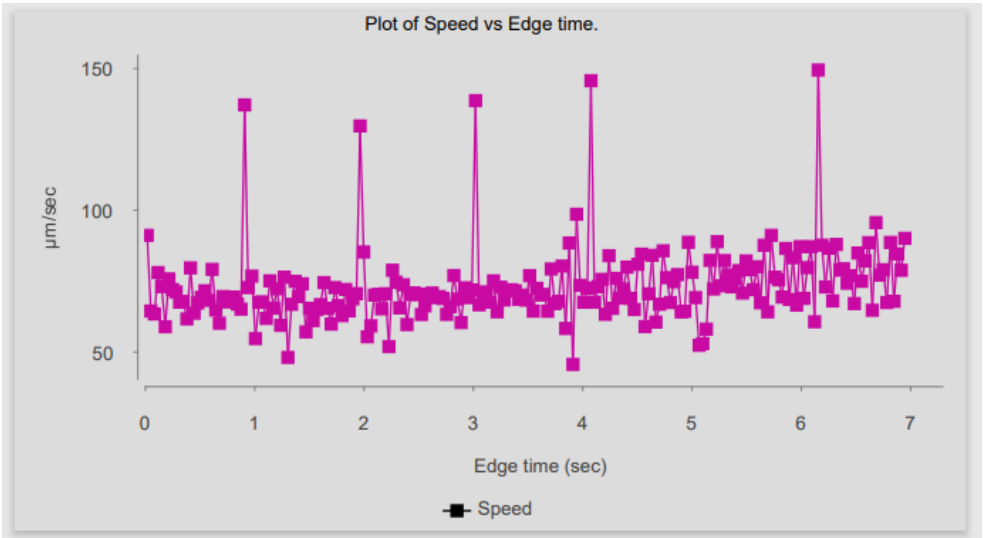

+ Mean speed, etc.
